# Supplementary material for: Unraveling Natalizumab Effects on Deregulated miR-17 Expression in CD4+T Cells of Patients with Relapsing-Remitting Multiple Sclerosis
Source: Hindawi journal article supplement (doi:10.1155/2014/897249), 2014-01-01
Supplement: f1 [file 897249.f1.pdf]

**Table 1. qPCR probe sequences of miRNAs and mRNAs.**

**Figure S1. PI3KR1 and PTEN expression analysis.** (A) CD4<sup>+</sup>T cells isolated from HV samples were stimulated with CD3/CD28 antibodies *in vitro* for 24 hours. Transcriptional expression of PI3KR1 (N=7) and PTEN (n=8) were analyzed with real time RT-PCR. (B) Western blot analysis of lysates from purified CD4<sup>+</sup>T cells (HV) after mitogenic stimulation with CD3/CD28 antibodies and probed for PI3KR1, PTEN, and phospho-PTEN. Actin levels were monitored as a control for loading. (C) Transcriptional expression of PI3KR1 was analyzed with real-time RT-PCR in and in CD4<sup>+</sup>T cells from untreated and natalizumab treated patients (untreated: n=8; Nat. treated: n=10). \*\*\* $p < 0.001$ ; \*\* $p < 0.01$ ; n.s: not significant.

**Figure S2. Correlation of age with relative expression of miR-17.** Non-parametric Spearman correlation, with two-tailed p-value, between miR-17 expression and age in HVs, untreated and natalizumab treated RRMS patients, was calculated. 95% confidence interval is depicted by dotted curves.

|          |                                                              |
|----------|--------------------------------------------------------------|
| miR-17   | CAAAGUGCUUACAGUGCAGGUAG                                      |
| miR-106b | UAAAGUGCUGACAGUGCAGAU                                        |
| RNU44    | CCTGGATGATGATAGCAAATGCTGACTGAACATGAAGGTCTTAATTAGCTCTAACTGACT |
| PTEN     | CCTCTTCCTCGGCTTCTCCTGAAAG                                    |
| BIM      | CAGTGCAATGGCTTCCATGAGGCAG                                    |
| P21      | CAGCATGACAGATTTCTACCACTCC                                    |
| E2F1     | TCCAGTGGCTGGGCAGCCACACCAC                                    |
| TGFBR2   | GCTCAACCACCAGGGCATCCAGATG                                    |
| PI3KR1   | GGGAGATATCTCGAGGGAAGAAGTG                                    |
| PUM1     | CTACCGCTCCGCCC GTGTTGGTGGA                                   |

Supplementary Table 1.

A.

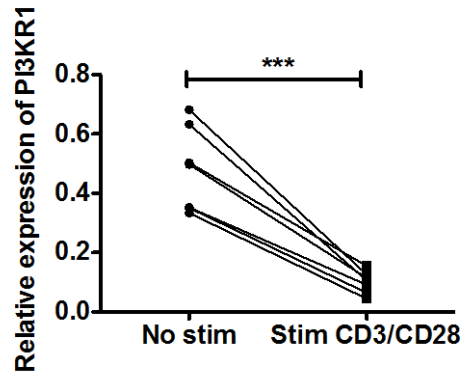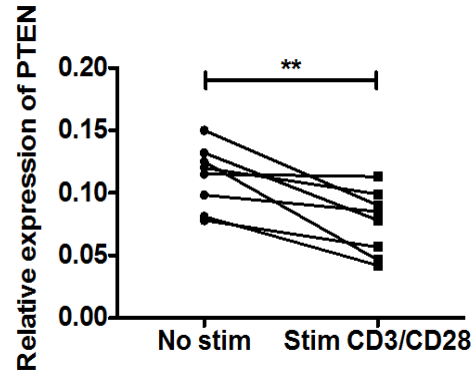

B.

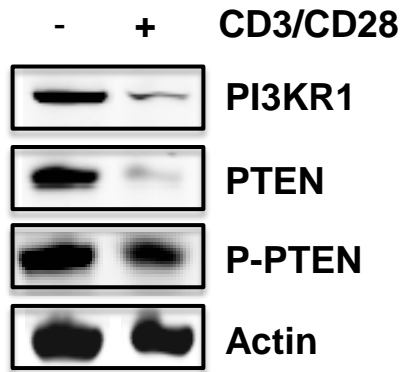

C.

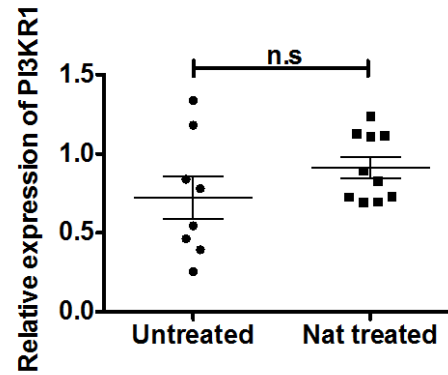

Figure S1.

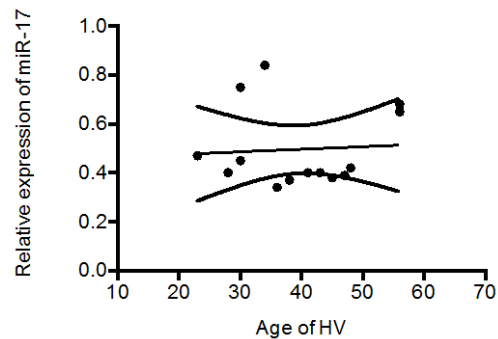

|                         |                   |
|-------------------------|-------------------|
| Spearman r              | -0.07080          |
| 95% confidence interval | -0.5912 to 0.4912 |
| P value (two-tailed)    | 0.8099            |
| P value summary         | ns                |

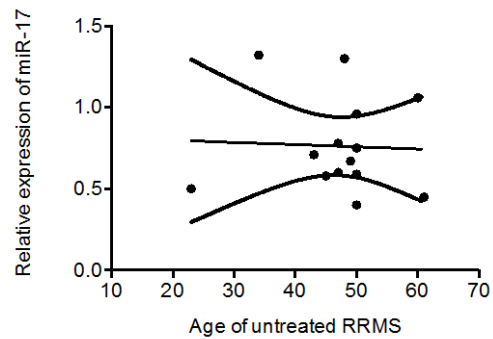

|                         |                   |
|-------------------------|-------------------|
| Spearman r              | -0.1090           |
| 95% confidence interval | -0.6157 to 0.4614 |
| P value (two-tailed)    | 0.7106            |
| P value summary         | ns                |

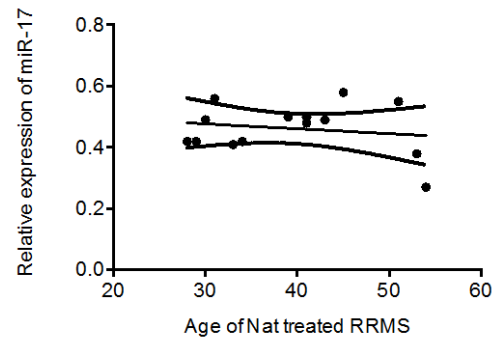

|                         |                   |
|-------------------------|-------------------|
| Spearman r              | -0.02104          |
| 95% confidence interval | -0.5578 to 0.5281 |
| P value (two-tailed)    | 0.9431            |
| P value summary         | ns                |

Figure S2.
